## Hopanoid composition mediates bacterial ethanol tolerance

Itay Budin<sup>1,2\*</sup>, Léa Brenac<sup>1†</sup>, Edward Baidoo<sup>1</sup>, and Jay D. Keasling<sup>1,2,4-9\*</sup>

\*Correspondence: [budin@berkeley.edu](mailto:budin@berkeley.edu), [keasling@berkeley.edu](mailto:keasling@berkeley.edu)

1. Joint BioEnergy Institute, 5885 Hollis Street, Emeryville, CA 94608
  2. Department of Chemical & Biomolecular Engineering, University of California, Berkeley, Berkeley CA 94720
  3. Department of Chemistry, University of California, Berkeley, Berkeley, CA 94720
  4. Department of Bioengineering, University of California, Berkeley, Berkeley CA 94720
  5. QB3 Institute, University of California, Berkeley, Berkeley, CA 94270
  6. Biological Systems & Engineering, Lawrence Berkeley National Laboratory, Berkeley, CA 94720
  7. The Novo Nordisk Foundation Center for Sustainability, Technical University of Denmark, Denmark
  8. Center for Synthetic Biochemistry, Institute for Synthetic Biology, Shenzhen Institutes for Advanced Technologies, Shenzhen, CN
- † Current affiliation: Lonza Ltd, Visp Switzerland

## Abstract:

Hopanoids are abundant membrane lipids found in diverse bacterial lineages, but their physiological roles are not well understood. The fermenter *Zymomonas mobilis* features the highest measured concentration of hopanoids - up to 50% of all lipids in the cell<sup>1</sup> - leading to the hypothesis that these lipids can protect against ethanol toxicity. In principle, the condensing effect of hopanoids, analogous to eukaryotic sterols<sup>2,3</sup>, could buffer against changes to membrane structure induced by solvents. However, there is no clear link between ethanol exposure and hopanoid biosynthesis in *Z. mobilis*<sup>1,4,5</sup>, and the lack of genetic tools for manipulating hopanoid composition *in vivo* has limited their further functional analysis. Because of polyploidy (> 50 genome copies per cell), we found that disruptions of essential hopanoid biosynthesis (*hpn*) genes in *Z. mobilis* act as genetic knockdowns, reliably modulating the abundance of different hopanoid species. Using a set of *hpn* transposon mutants, we demonstrated that both reduced hopanoid content and modified hopanoid head group composition mediate growth and survival in ethanol. In contrast, the amount of hopanoids, but not their composition, contributes to fitness at low pH. Spectroscopic analysis of model membranes showed that hopanoids protect against several ethanol-driven phase transitions in bilayer structure, including bilayer expansion and lipid interdigitation. We propose a model by which hopanoids act through a combination of hydrophobic and inter-lipid hydrogen bonding interactions to stabilize bacterial membranes against chemical stress.

## Main text:

Triterpenoids are a class of cyclized lipids used by cells as bulk membrane building blocks. The canonical triterpenoids are eukaryotic sterols, in which squalene is oxidized before cyclization, leaving a hydroxyl to act as a polar head group. With very few exceptions<sup>6</sup>, bacteria instead synthesize hopanoids, in which squalene is first cyclized into hopene and then derivatized with polar groups<sup>7</sup>. Hopanoids are thought to mimic the well-known effects of sterols on membrane ordering and permeability<sup>3,8,9</sup>. Unlike sterols, however, they are generally present in complex mixtures of several derivatives, which could diversify their functions. They are also not as widespread, being absent in a majority of cultured bacterial strains<sup>10</sup> and environmental samples<sup>11</sup>. In bacteria with non-essential hopanoids, hopanoid biosynthesis (*hpn*) mutants have been used to identify functional roles related to chemical stress. In *Burkholderia cenocepacia*, hopanoid-free cells were found to be sensitive to low pH and detergents<sup>12</sup>, while in *Rhodopseudomonas palustris* they are more sensitive to both low and high pH<sup>13</sup> as well as bile salts<sup>14</sup>. In *Bradyrhizobium diazoefficiens*, mutants lacking elongated hopanoids showed membrane defects and were sensitive to antibiotics, acid, and detergent<sup>15</sup>. The biophysical basis for these phenotypes has not been well studied, nor have physiological roles been characterized in bacteria where hopanoids are essential.

Because of its unusual glycolytic metabolism<sup>18</sup>, the alphaproteobacterium *Z. mobilis* produces ethanol approaching theoretical yields<sup>19</sup>, leading to its adoption for industrial fermentation applications<sup>20</sup>. Native to palm wine fermenters<sup>16</sup>, *Z. mobilis* features a remarkable tolerance to ethanol, with reported growth in media containing up to 16% (v/v) ethanol<sup>17</sup>. Like other solvents, ethanol alters the lipid packing<sup>21</sup> and phase properties<sup>22</sup> of model membranes. In contrast to longer chain alcohols that fluidize membranes, the physicochemical effects of ethanol are complex, and include the induction of membrane phase transitions that increase membrane ordering<sup>21</sup>. In ethanol-tolerant yeast, unsaturated fatty acids mediate ethanol tolerance<sup>23,24</sup>, even though these lipids are thought to have opposing biophysical effects as triterpenoids.

Testing whether hopanoids mediate ethanol tolerance requires genetic tools to modulate their abundance in cells. In *Z. mobilis*, a transposon-based gene disruption has previously been used to generate loss of function mutants to carry out systematic fitness analyses<sup>25</sup>. Surprisingly, this effort yielded transposon insertions in essential genes, e.g. those encoding for RNA/DNA polymerases. Such an effect could result from polyploid cells containing both mutant alleles, carrying antibiotic resistance markers, and functional ones, carrying essential genes. We hypothesized that this dynamic could reduce the copy number of biosynthetic genes, thereby functioning as genetic knockdowns and allowing for functional studies of hopanoid composition.

## Results:

We first collected a redundant set of 25 Tn5 mutants of the *Z. mobilis* strain ZM4 covering annotated genes in the hopanoid biosynthesis pathway (Fig. 1a). Mutants with transposons at different positions in the same genes showed identical fitness profiles (Fig. S1), indicating that insertions acted as null mutations. When grown under antibiotic selection for the transposon, PCR analysis of transposon-inserted *hpn* genes showed the existence of both wild-type and mutated alleles (Fig. 1b), with varying apparent abundances. To confirm that heterozygosity was due to polyploidy, we measured chromosome numbers per cell directly using a qPCR-based approach (Fig. 1c). We found that *Z. mobilis* cells were highly polyploid, containing > 50 copies of two different genomic loci under our growth conditions. In contrast, a monoploid bacterium (*E. coli* in minimal medium) featured 1-2 genome copies per cell. We measured the transposon insertion rate for *hpn* mutants using high coverage genome sequencing, quantifying the number of reads matching to each allele (Fig 1d). The mutant allele frequency ranged from 31 to 100%, with non-duplicated genes early in the pathway featuring the lowest abundance and non-essential genes late in the pathway mimicking full knockouts (Table S1).

Since *hpn* mutants reduce the fraction of functional alleles in a cell, we hypothesized that they would reduce the abundance of the downstream product of each Hpn enzyme. We therefore used a combination of mass spectrometry approaches to characterize the

hopanoid composition of mutants grown under transposon selection. The products of squalene cyclization, hopene (Fig. 2a) and diplopterol (Fig. 2b), were measured by GC-MS of silylated lipid extracts (Fig. S2a). Both showed decreased abundance in squalene synthase (*hpnC*, *hpnD*) mutants, consistent with their position upstream in the pathway. Lipids from *hpnF* and *shc* mutants, which exhibited almost complete disruption (Table S1), showed distinct distributions of squalene cyclization products: the *shc* mutant accumulated less hopene, while the *hpnF* mutant accumulated less diplopterol, suggesting differing product preferences these SHCs. Lipids from the *hpnH* mutant exhibited higher hopene levels, consistent with the role of HpnH in converting hopene to adenosylhopane. Later genes in the pathway (*hpnG*, *hpnI*, *hpnK*, *hpnJ*) mildly altered levels of these products, possibly reflecting feedback regulation in the pathway, as have been well-characterized for sterol biosynthesis<sup>26</sup>.

We next analyzed the distribution of elongated hopanoids, which compose the majority of final hopanoid products in *Z. mobilis*, using liquid chromatography coupled to ambient pressure chemical ionization time of flight mass spectrometry (LC-APCI-TOF-MS) (Fig. 2c-e, Fig. S2b, c). Mutants targeting enzymes upstream of the elongated hopanoids all showed reduced abundance of all these products, but did not alter their stoichiometries. Instead, it was mutants of the three genes downstream of bacteriohopanetetrol (BHT) in the pathway (*hpnI*, *hpnK* and *hpnJ*) that altered elongated hopanoid distribution. The *hpnI* mutant exhibited an accumulation of BHT accompanied by a reduction of the BHT derivatives. Analyses of the *hpnK* mutant was hindered by the acetylation of BHT glucosamine used during lipid derivatization. However, the increased ratio of BHT glucosamine to BHT cyclitol ether (2:1) we observed was consistent with its expected role as a deacetylase. In the *hpnJ* mutant, no BHT cyclitol ether could be detected, in agreement with it being near complete gene knock out (98% mutant alleles).

Lipid analysis confirmed the proposed biosynthetic route for hopanoids in *Z. mobilis* and showed that transposon disruptions act as functional knockdowns, resulting in changes in hopanoid abundance and distribution (Fig. 2f). We tested whether these changes modulate the physical properties of lipid bilayers using the anisotropy-based probe di-

phenyl-hexatriene (DPH), a classic test of ordering in the hydrophobic membrane core<sup>27</sup>. Membranes prepared from extracted lipids with reduced hopanoid content showed significantly lower DPH anisotropy (Fig. S3), while those with altered head group composition showed a milder effect. This pattern is consistent with the hopene moiety – common to all hopanoids – being responsible for increasing hydrocarbon packing in the membrane, similar to sterols.

We sought to use *hpn* mutants to assess the proposed physiological role for hopanoid composition in *Z. mobilis* ethanol tolerance. In standard rich media (RM), exponential growth rates of different mutants were correlated to their total hopanoid content, likely reflecting physiological roles for these lipids under non-stressed conditions (Fig. S4). We focused further investigation on a set of strains that sampled different aspects of hopanoid composition: reduced total hopanoid content (*hpnC* or *hpnD*), reduced accumulation of elongated hopanoids (*hpnI*), or absence of BHT cyclitol ether (*hpnJ*), comparing each with the behavior of a kanamycin-resistant control (Fig. 3a). For growth with 8% (v/v) ethanol, *hpn* mutants showed a significantly larger growth defect compared to the control (Fig. 3a,b). This effect was significant both for mutants with reduced hopanoid content and those with altered elongated hopanoids. A similar pattern was found for toxicity after acute (30 min) exposure to high ethanol concentration (20%), with each mutant featuring significantly reduced survival (Fig. 3c).

In addition to ethanol, we considered other forms of chemical stress tolerance that would be characteristic of the native environment for *Z. mobilis*. Fermentation is characterized by acidic conditions, and *Z. mobilis* grows robustly between pH 3 and 4, matching the acidity of palm wine<sup>16</sup>. Accordingly, we found that *hpn* mutants with reduced total hopanoid content (*hpnC* and *hpnD*) reduced growth rates at pH 3.9 (Fig. 3d) and survival at pH 2.5 (Fig. 3e). However, mutants that altered hopanoid composition, but not total abundance (*hpnI* and *hpnJ*), showed no significant loss in acid tolerance, in contrast to ethanol. We hypothesized that this discrepancy reflects different modes of lethality imposed by these chemical stresses. Assaying envelope integrity with SYTOX staining

showed that high ethanol exposure (> 20% v/v) led to membrane permeabilization, while lethal acidic conditions (pH 2.0) did not (Fig. S5).

We explored the mechanisms by which hopanoids protect membranes against ethanol-mediated permeabilization using liposomes assembled from *hpn* mutant lipid extracts. Because of its hydrophilicity, ethanol interacts with lipid membranes at the solvent-bilayer interface<sup>28</sup>. We therefore employed the fluorescent probe Laurdan, whose emission is sensitive to solvent access near the head group interface<sup>29</sup>, to track changes to membrane structure in response to ethanol. As bilayers become disordered, they allow in more polar solvents, and Laurdan emission becomes red-shifted. This emission shift is quantified with a General Polarization (GP) ratio. Because Laurdan remains partitioned in lipid membranes independent of ethanol concentration<sup>30</sup>, changes in GP reflect changes in membrane ordering. We found that Laurdan GP has a triphasic dependence on ethanol concentration, which tracks previously identified membrane phase transitions (Fig. 4a-c). Initially, ethanol acts to disorder membranes, increasing head group spacing (bilayer expansion) and solvent accessibility, thereby reducing GP. At a critical concentration (~10%), the trend is reversed as phospholipid acyl chains become interdigitated across the bilayer, a gel-like phase transition<sup>31,32</sup> that increases GP. At a second critical threshold, Laurdan emission strongly red shifts, reflecting the dissolution of the bilayer structure at high ethanol concentrations (>25%).

Consistent with our physiological data, hopanoid composition mediated the changes to membrane structure induced by ethanol (Fig. 4d). Under basal conditions (0% ethanol), reductions in total (*hpnC*) and extended (*hpnI*) hopanoids led to decreased membrane ordering, with the latter having the larger effect (Fig. 4). This is in contrast with membrane ordering of the hydrophobic core measured with DPH (Fig. S3), likely reflecting the importance of the hopanoid polar head group in driving ordering at the solvent-bilayer interface. This trend continued during bilayer expansion at 8% ethanol, which led to uniform decrease in Laurdan GP among all compositions. At higher ethanol concentrations (20%), Laurdan GP was significantly higher in hopanoid-depleted (*hpnC*) membranes, indicating a more pronounced interdigitated phase compared to membranes

with wild type levels of hopanoids. At 25% ethanol, both *hpnC* and *hpnI* liposomes showed a dramatic drop in Laurdan GP, indicating a loss of membrane structure while control liposomes remained intact. Therefore, both hopanoid abundance and head group composition act to prevent membrane dissolution at high ethanol concentrations.

Although the parameters for phase transitions in model membranes might not exactly correspond to those in intact cells, it is worth considering their physiological relevance. The toxicity threshold for ethanol in cells – around 20% v/v – corresponds to a highly interdigitated state observed in liposomes. Although membranes are ordered in this state, they are also highly leaky<sup>33</sup>, consistent with SYTOX staining of cells in 20% ethanol. Accordingly, the mutant with reduced hopanoid amount (*hpnC*) showed the strongest interdigitated effect, as measured by increase in Laurdan GP, and also the lowest survival under acute ethanol toxicity (Fig. 3c). In contrast, it was mutants with the fewest elongated hopanoids (*hpnI*) that showed the largest growth defect (Fig. 3b) and greatest fluidization (Fig. 4d) under mild or moderate ethanol concentrations (8%).

## Discussion:

Hopanoids are commonly thought to mimic the effects of eukaryotic sterols, whose planar structures condense lipid bilayers, reducing the area per phospholipid, and acyl chain mobility<sup>34</sup>. These structural changes lower the permeability of polar molecules across the bilayer, including protons<sup>35</sup>, and therefore provide a straightforward mechanism for acid tolerance based on reduced proton leakage. During ethanol stress, hopanoids instead act to mediate the phase properties of membranes: bilayer expansion at low concentrations, interdigitation at medium concentrations, and dissolution at higher concentrations. All these transitions are likely resisted by the increased packing of lipids that triterpenoids impart. Notably, cholesterol has previously been shown to resist the interdigitated phase transition in lipid vesicles<sup>36</sup>. In this way the interplay of hopanoids and ethanol mimics that of sterols or other triterpenoids.



One way hopanoids differ from other triterpenoids is in their polar head groups, which feature elongated polyhydroxylated moieties. Elongated hopanoids make up ~90% of all species in *Z. mobilis* and we found that their composition also mediates ethanol tolerance. We propose a very different functional analogue for these structures: di-acyl glycerol lipids modified by one or more sugar groups (glycolipids), which are highly abundant in plant thylakoid and in cell-wall less bacteria. Glycolipids promote membrane ordering through hydrogen bonding interactions between adjacent lipid head groups<sup>37</sup>. The phase behavior of glycolipid-containing membranes can be mediated by changes in head group structure, such as the type of glucoside linkage in a disaccharide<sup>38</sup>. Sugar-modified lipids, including glycolipids, hopanoids, and ceramides, could act as a general mechanism to buffer membrane structure against chemical agents (solvents, detergents) or other physical stresses (temperature, shear forces) that alter hydrophobic interactions. Hopanoids, however, are unique in that they feature both hydrocarbon and polar structural elements that promote bilayer stability. It is likely that the combination of these features allows different hopanoids species to maintain membrane stability in response to the wide-range of environmental challenges experienced by bacterial cells.

**Acknowledgments:** Dr. Jeffrey Skerker provided strains and technical assistance. Dr. Tristan de Rond, Dr. Patrick Shih, and Mitchell Thompson provided helpful discussions.

**Funding:** This work was part of the DOE Joint BioEnergy Institute (<http://www.jbei.org>) supported by the U. S. Department of Energy, Office of Science, Office of Biological and Environmental Research, through contract DE-AC02-05CH11231 between Lawrence Berkeley National Laboratory and the U. S. Department of Energy. This work was also supported by National Science Foundation grants MCB-1442724 and MCB-1715681 to J.D.K.

**Author contributions:** I.B., L.B., and J.K.D. conceived the study and designed the experiments. L.B. and E.B. performed lipid analysis. I.B. and L.B. performed all other experiments. All authors wrote the paper and discussed the results.

## Materials and Methods:

*Cell growth physiology:* *Z. mobilis* strains were grown in rich medium (RM) (10 g/L yeast extract (Becton Dickinson), 2 g/L potassium phosphate dibasic, and 20 g/L glucose, pH 6.2) in culture tubes shaking at 200 rpm at 30°C, unless otherwise noted. For mutants, the medium was supplemented with kanamycin (100 µg/mL). For each culture, 5 mL of medium was inoculated from a glycerol stock and strain was allowed to grow for 2 to 3 days under selection. Cultures were then back-diluted into 10 mL fresh medium; the inoculation ratio was varied across ZM4 mutants (from 0.1% to 2.5% v/v) to account for growth rate variability and enable harvesting after 20-22 hours in early stationary phase. Cells were then harvested for lipid, DNA extraction, or toxicity tests. For lipid analysis, characteristic cultures of each mutant were also dried to completeness and massed, in order to correlate optical density to cell dry mass.

For *E. coli* experiments, K12 cells (MG1655) were grown in MOPS minimal medium pH 7.2 (Teknova) with 0.6% (w/v) succinic acid as the carbon source. Cells were grown to early stationary phase (OD ~ 1.0) at 30°C in 10 mL cultures before being harvested for ploidy quantification and to stationary phase (OD ~ 2.0) in 50 mL Luria Broth medium for lipid extractions.

For fitness analysis, *Z. mobilis* growth curves were recorded in 1 mL cultures in 24-well plates (Falcon) inoculated with 10 µL of overnight culture. The plates were sealed with a semi-permeable film (Thermo Fischer) and incubated at 30°C in a Synergy 4 plate reader (BioTek) with shaking and absorbance readings (600 nm) every five minutes, for 24 to 72 hours. For acute toxicity measurements, cells were spun down in early stationary phase and resuspended in RM (control) and RM supplemented with ethanol (20% v/v) or HCl (until pH 2.5). After incubation (30 min), cells were serially diluted and plated on RM agar plates in technical triplicates. Cell survival was measured by the ratio of colony forming units (CFUs) compared to the control condition. For assaying of permeabilization, cells were incubated with 30 nM of SYTOX Green Dead Cell Stain (Invitrogen) for 15 minutes. The fluorescence intensity of 100,000 cells was then measured on an Accuri flow

cytometer (BD) using a GFP fluorescence filter set. Data was analyzed and plotted using FlowJo.

*Genetic analyses:* The function of each *hpn* gene was deduced from their roles described by loss of function studies in other bacteria<sup>14,39,40</sup>. For PCR and copy number measurements, 2 mL of cultures grown to early stationary phase and genomic DNA extracted with a Wizard Genomic DNA Purification Kit (Promega). Outside-in colony PCR of a subset of *hpn* genes was performed with PrimeSTAR DNA polymerase (TaKaRa) using the following primers:

*hpnC*: CCACATGATTTCCCGTTCAGCTTATG and CCGGTTCTTTCAGAAAAGCGGC

*hpnI*: GCCAAGGGCTTCGAGTTACTATAAACT and TGACTTTTTTAAGAGCCGCTACGGT

*hpnJ*: CGGAAGTGCGTCACTTATCCC and ACTGAGAAGCCCTTAGAGCC

For quantifying transposon insertion rates, genomic DNA libraries were prepared using NEBnext DNA Library Prep Master Mix Set for Illumina (New England Biolabs) following the instructions for 400 bp insert libraries. Sequencing was performed using the 600-cycle Miseq Reagent Kit v3 (Illumina) on the MiSeq system (Illumina). For analysis, the online platform of Galaxy (usegalaxy.org) was used, with alignments performed with the *Map with BWA-MEM* tool to ZM4 genomes to which a typical transposon sequence (KanR Tn5 with an inserted TagModule) had been juxtaposed. The resulting alignment file was opened with UGENE and the fragments aligned to the border of the transposon were examined to find the transposon insertion locus. The genome files were updated with actual transposon insertions and the alignment was repeated. The coverage depth was calculated with *plotCoverage* tool. To estimate the transposon insertion rate, the mean coverage depth over the whole genome was computed and compared to the mean coverage depth of a 500 bp conserved region inside the transposon's KanR cassette.

Quantification of ploidy was performed using qPCR as previously described<sup>41</sup>. Briefly, cells were harvested at early stationary phase and serially diluted. A hemocytometer was used to count the density of cells in the dilutions, and solutions containing discrete number

of cells were then prepared. From these, genomic DNA was quantitatively extracted using phenol:chloroform extraction after cell lysis, as previously described<sup>42</sup>. Separately, standards containing the two targeted loci were amplified from *Z. mobilis* (Z1, Z2) and *E. coli* genomic DNA (E1, E2) using the following primers:

**Z1 standard:** TTGTGTTAAAGGGAGCGAGAC and AGACATATGTCCACGGACTTCTAA

**Z2 standard:** AATTTCAAAGGGGCCTTAGCT and TTAAAGACCCTCCTACTGCTTGT

**E1 standard:** ATTGCCCATAAACGAGAATACC and GGAAGCTTGGATCAACCG

**E2 standard:** TAACGCGTCGTCTGAAACC and TAGACGCCAGCATGTTTCGTAA

The single-product amplification of the resulting standards, 1 KB in length, was confirmed by agarose electrophoresis, which was then purified by a PCR cleanup kit (Qiagen). The concentration of the standard was quantified by absorbance at 260 nm and then serially diluted to prepare a standard curve. PCR reactions for both gDNA samples and the standards was prepared with SYBR Green Master Mix (Invitrogen), using primer pairs that amplified a ~250-bp insert in the standards above:

**Z1 analysis:** TAAACAGCCTTTTAAATTTTGTGTTCTTG and

GTTTATTTTCGGTATTTTGTGACGCAG

**Z2 analysis:** ATTTTCGATATTGTTCTGCAGTATCG and

TACTCAAGACCTTCAATATTGTTTTAACAT

**E1 analysis:** AAAGTGGATACCCGCCTG and CCTTTTGACGTCATCATCATTG

**E2 analysis:** ATCCGTGATGAAGTGGGG and AATGCAGTAACCACAGCC

Amplification was measured on a StepOnePlus Real-Time PCR System (Applied Biosystems). Quantification of gDNA abundance relative to the standard curve was performed using the  $\Delta C_T$  method.

*Lipid analyses:* The lipid extraction protocol used in this study was adapted from Bligh and Dyer<sup>43</sup>. Cell pellets from 10 mL of culture were resuspended in a 400 microliters of water and sonicated for 10 minutes at 50°C. Chloroform and methanol (1:1, 5 mL) were

added and the monophasic extraction mixture was bath sonicated for 1 hour at 50°C and then left to shake for 3 hours at 37°C. Water (2.5 mL) was then added and complete separation of the organic (chloroform) and water/methanol phases was achieved through centrifugation. The organic phase was collected and evaporated to dryness under N<sub>2</sub> flux.

For analysis of hopene and diplopterol by GC-MS, dry lipids were silylated in 150 µL of N,O-Bis (trimethylsilyl) trifluoroacetamide (BSTFA kit, Supelco) and 150 µL of pyridine for 2 hours at 50°C. The solvent was then evaporated under N<sub>2</sub> flux. The product was then extracted in hexane (100 µL) and filtered (Nylon 0.2 µm 500 µL centrifugal filters, VWR) before analysis. Gas chromatography was performed on an HP 6890 Series GC-System (Hewlett Packard) equipped with a DB-5MS capillary column (30 m length x 0.25 mm internal diameter, 25 µm film; J&W). 1 µL of sample was injected at a temperature of 250°C and the GC was run in splitless mode with a Helium (carrier gas) flow rate of 1 mL/min at a pressure of 9.36 psi. The temperature program of the oven was as follows: held at 80°C for 1 min after injection, heated to 280°C at 20°C/min, held at 280°C for 15 min, heated to 300°C at 20°C/min and held for 7 min. The column was linked to a HP 5973 Mass Selective Detector (Hewlett Packard). The source and quad temperature were set to 300°C and 200°C, respectively. The solvent delay was set to 9 min. For quantification of C<sub>30</sub> hopanoids, the SIM mode (191 *m/z* for hopene and 131 *m/z* for diplopterol) was used with a dwell time of 100 ms and 3 cycles/s. Data collection and processing were performed with HP Enhanced ChemStation software (Agilent Technologies).

For analysis of elongated hopanoids, lipid extraction was performed as described above, with a known amount (100 µg) of an internal standard (5α-pregnane-3β,20β-diol) added to the extraction mixture. The following derivatization procedure was adapted from Talbot *et al.*<sup>44</sup> The dried chloroform extract was acetylated in 3 mL of acetic anhydride/pyridine (1:1 v/v) at 50°C for 1 hour and left stand overnight at room temperature. The solvent was then evaporated under N<sub>2</sub> flux and the acetylated lipids were dissolved in 250 µL of methanol/isopropanol (6:4 v/v). The samples were centrifuged for 10 minutes at maximum speed and transferred to glass vials. Liquid chromatography was performed with a

Kinetex XB-C18 column (100 mm length x 2.1 mm internal diameter, 2.6  $\mu\text{m}$  particle size; Phenomenex) at 50°C, with a 1200 Series HPLC system (Agilent Technologies). The injection volume was 3  $\mu\text{L}$  and separation was achieved with a flow-rate of 0.45 mL/min and the following mobile phase gradient profile: 20% to 42% B in 2.2 min, held at 42% B for 3.6 min, 42% to 100% B in 0.1 min, held at 100% B for 2.1 min, 100% to 20% B in 0.1 min, held at 20% B for 4.3 min (where solvent A is composed of 30% isopropanol/40% methanol/30% water, and solvent B of 90% isopropanol/10% water; HPLC grade, Honeywell Burdick & Jackson). The HPLC system was linked to an Agilent Technologies 6210 time-of-flight mass spectrometer (LC-TOF MS), with 1/5 post-column split, via a LAN card. Nitrogen was used as nebulizing (6 L/min) and drying (300°C, 30 lb/in<sup>2</sup>) gases. The vaporizer temperature was 250°C. The corona was set to 7  $\mu\text{A}$ . Atmospheric pressure chemical ionization (APCI) was conducted in the positive ion mode with a capillary voltage of 3000 V. Full-scan mode (100–1500  $m/z$ ) at 1 spectrum/s was used for MS experiments. TOF-MS was calibrated with Agilent APCI TOF tuning mix. Data acquisition and integration were performed by the MassHunter Workstation (Agilent Technologies) and MassHunter Qualitative Analysis (Agilent Technologies), respectively. The targeted ions are presented in Table S2; quantified analytes were normalized to the internal standard in order to correct for variations in ionization strength.

*Biophysical analyses:* Liposomes were prepared from lipids extracted from early stationary phase cells (100 mL) using a scaled-up version of the procedure described above. Upon complete drying of the organic phase under vacuum, the extracted lipids were massed and solubilized in chloroform at 1 mg/mL. For each liposome preparation, 300  $\mu\text{L}$  of the lipid solution was transferred to a borosilicate test tube and dried with Argon. The resulting film was further dried for 1 hour under vacuum. Liposomes were formed by resuspending the film in buffer (20 mM HEPES, pH 7.0), followed by overnight incubation with gentle agitation. Liposome formation was confirmed by microscopy of the samples labeled with Rhodamine 6G, a membrane dye. Before analysis, liposomes were extruded to 100 nm with a miniextruder (Avanti Polar Lipids).

For DPH experiments, liposomes were incubated with 0.5% (v/v) of a 5 mM DPH (Sigma) stock solution in ethanol. Samples were then incubated for at least one hour under gentle agitation. Steady-state anisotropy was measured using a Fluorolog spectrofluorometer (Horiba) with automated polarizers; excitation was set to 360 nm, and emission at 430 nm. For Laurdan experiments, liposomes were incubated with 1.0% (v/v) of a 1 mg/ml stock solution of Laurdan (Invitrogen) in DMSO. Laurdan emission was measured from 380 to 600 nm upon excitation at 365 nm. Laurdan GP was calculated as the ratio of integrated emission intensities at two different ranges of wavelengths:  $GP = (I_{420-440nm} - I_{490-510nm}) / (I_{420-440nm} + I_{490-510nm})$ .

## Figures:

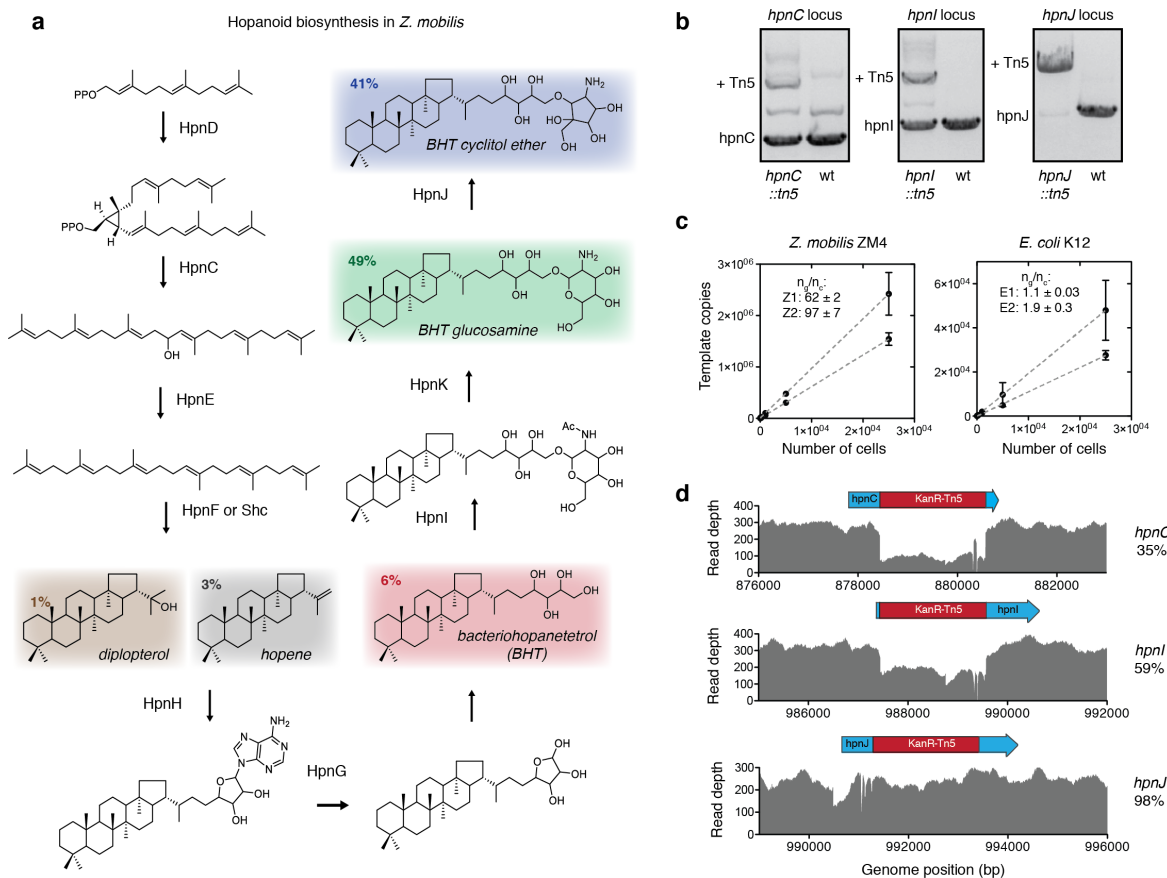

**Figure 1:** Genetic characterization of *hpn* transposon mutants in *Z. mobilis*. **(a)** Hopanoid biosynthesis occurs via a multistep pathway catalyzed by products of highly conserved *hpn* genes. Colored species indicate mature products and their reported abundance in wild type cells<sup>1</sup> (as a % of total hopanoid weight content). **(b)** Characteristic colony PCRs showing the *hpn*::Tn5 strains contain both native *hpn* alleles and mutant *hpn*::Tn5 ones in varying amounts. In mutants early in the pathway (e.g. *hpnC*), the native allele is dominant over the mutant, but this is reversed for those late in the pathway (e.g. *hpnJ*). **(c)** Measurement of ploidy in *Z. mobilis* using qPCR of DNA extracted from counted cells, whose amplification was normalized with that of purified template standards. For *Z. mobilis* (left), this analysis yielded genome copy numbers of ~60 and ~100 copies for two different loci (Z1 and Z2). In contrast, *E. coli* grown in minimal media, where it is monoploid, showed a copy number of ~1-2 (E1 and E2) by the same method (right). Values represent mean +/- SEM, n=3. **(d)** Quantification of mutant allele abundance by



deep sequencing of genomic DNA. Reads for each mutant were mapped to the genome sequence containing the transposon, and read coverage in the transposon was used to quantify the fraction of genome copies carrying the mutant allele. Shown are three examples that correspond to colony PCRs in panel (a); for each, a map native gene with the transposon insertion is shown above the coverage plot. Quantification for the rest of the mutants is found in Table S1.

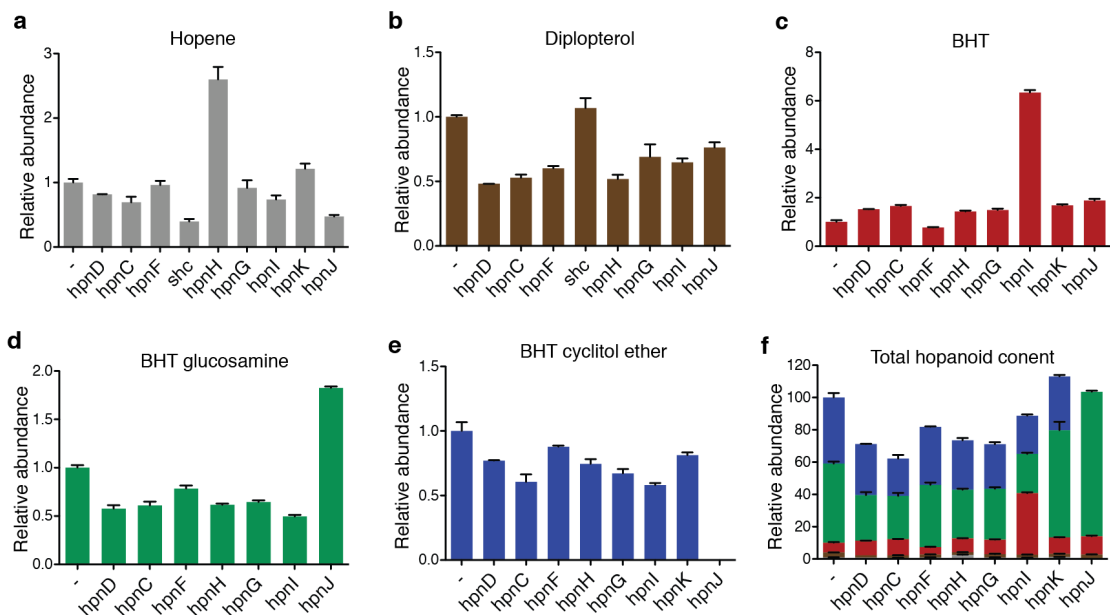

**Figure 2:** Composition of mature hopanoid species in *hpn* mutants or control cells (-). Cells were grown in RM media for 20-22 hours under kanamycin selection for the transposon and lipids were extracted as described in the Methods. Each species is color coded by their structures in Fig. 1a, and values are normalized to control cells. The abundance of hopene (**a**) and diplopterol (**b**) were measured by GC-MS of silylated lipid extracts, while BHT (**c**), BHT glucosamine (**d**) and BHT cyclitol ether (**e**) were measured by LC-APCI-TOF-MS of acetylated lipid extracts. Total hopanoids (**f**) are normalized by the absolute abundance of each species in wild type background as previously measured<sup>1</sup>.

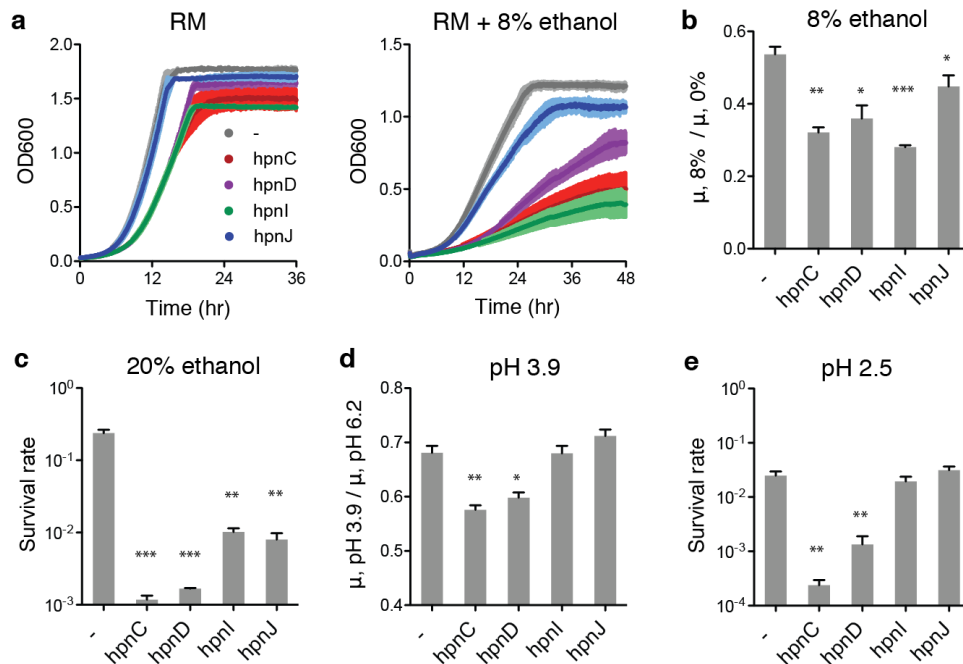

**Figure 3:** The effect of hopanoid knockdowns on *Z. mobilis* chemical tolerance. A subset of *hpn* mutants sampling hopanoid composition were chosen for analysis. (a) Under standard conditions on rich medium (RM), *hpn* mutants grow similarly to control cells (-), which feature a kanamycin cassette in non-essential lysine exporter. In 8% v/v ethanol, however, *hpn* mutants show visible growth defects compared to control cells. (b) The relative growth rates in 8% vs. 0% ethanol ( $\mu_{8\%} / \mu_{0\%}$ ) are significantly reduced for all *hpn* mutants compared to the control. (c) The *hpn* mutants also show significant increases in acute toxicity to ethanol, as measured by their survival rate after 30 min in 20% v/v ethanol. (d) In contrast to ethanol, only reduced hopanoid mutants (*hpnC* and *hpnD*) showed reduced relative growth in pH 3.9 vs. pH 6.2, while those that affected hopanoid composition (*hpnI* and *hpnJ*) did not show significant affects. (e) A similar pattern was observed for acute toxicity at high acidity (30 min at pH 2.5). Error bars indicate mean  $\pm$  SEM (n=3). Unpaired t-tests were used to assess significance against control cells (-): \*,  $p < 0.05$ ; \*\*,  $p < 0.01$ , \*\*\*,  $p < 0.001$ .

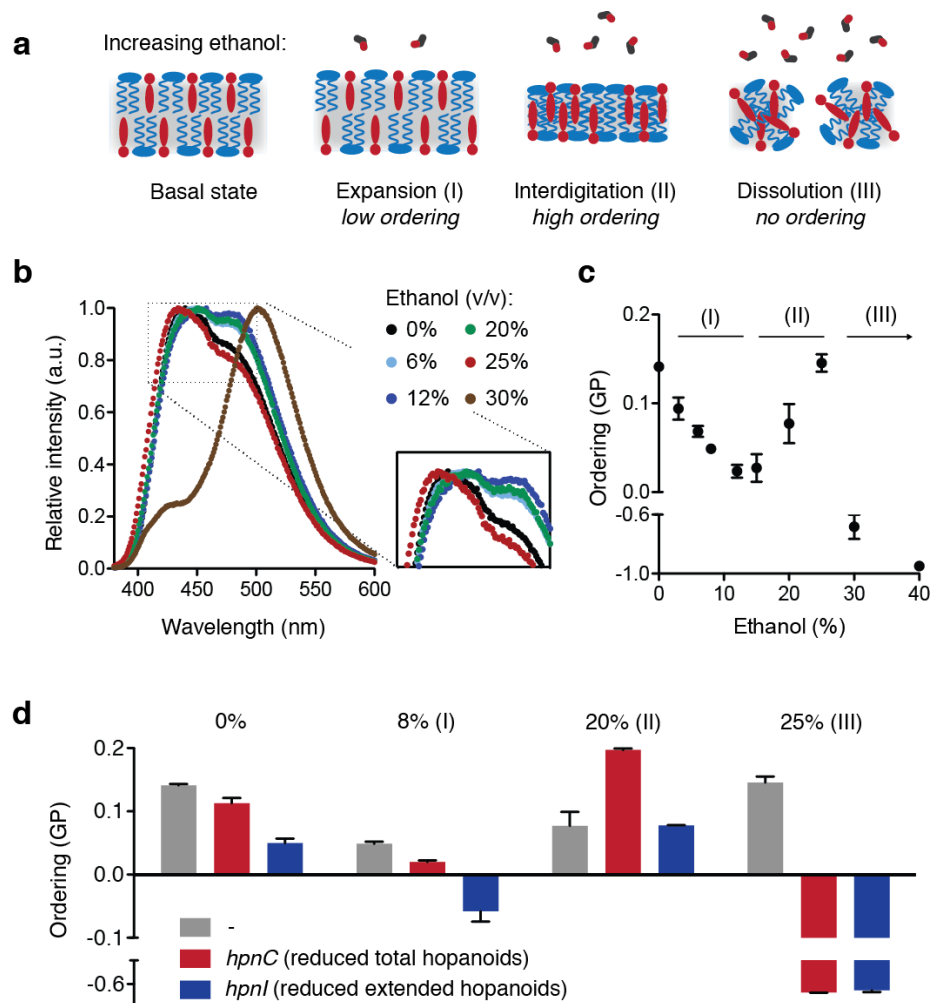

**Figure 4:** Hopanoids mediate changes to bilayer structure induced by ethanol. (a) Cartoon showing the sequential phase transitions in membranes caused by increasing ethanol concentrations, including bilayer expansion (I), lipid interdigitation (II), and membrane dissolution (III). The blue and red species representing phospholipids and hopanoids, respectively. (b) Emission spectra of Laurdan in liposomes reconstituted from extracted *Z. mobilis* lipids with different amounts of ethanol. At low concentrations (6, 12%), ethanol red-shifts Laurdan emission, indicating more solvent access to the bilayer. At intermediate concentrations (20, 25%), this effect is reversed due to interdigitation. At high concentrations (30%), emission is strongly red-shifted, indicating solubilization of the membrane. (c) Quantification of membrane ordering, measured as Laurdan GP, and its triphasic dependence on ethanol concentration in membranes containing *Z. mobilis* lipids.

Each of the three regimes (I, II, III) corresponds to a structural transition diagrammed in panel a. (d) The effect of mutant lipid compositions with hopanoid content (*hpnC*) or changes in its headgroup composition (*hpnI*) on membrane ordering. Compared to control membranes, reduced amounts of elongated (*hpnI*) and total (*hpnC*) hopanoids lead to greater solvent access under basal conditions (0%) and at 8% ethanol. At 20% ethanol, hopanoid-deficient (*hpnC*) membranes show reduced solvent access, indicating a stronger interdigitated phase transition. At 25% ethanol, control membranes are ordered and intact, but ones with altered hopanoid compositions have dissolved. Error bars indicated SD, n = 3.

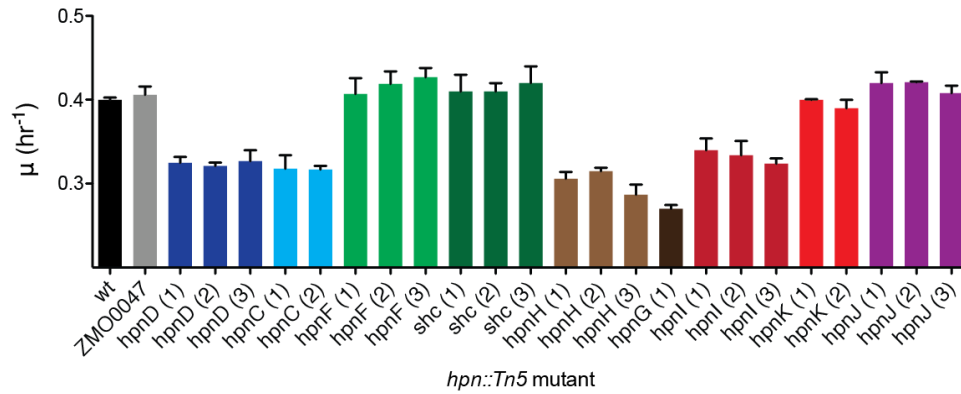

**Figure S1:** Redundant mutants of *hpn* genes, which feature Tn5 insertions in different sites, feature identical exponential growth rates ( $\mu$ ), indicating that all act similarly as loss of function mutations. Wild type cells (wt) and a kanamycin resistant control (ZMO0047, with a Tn5 insertion in a non-essential lysine exporter) are used as controls throughout this study. Because each redundant mutant featured similar fitness (e.g. *hpnD* (1) vs. *hpnD* (2)) only one of them was chosen for further genetic, chemical, and physiological analysis. Colors indicate mutants of the same gene. Error bars indicate SD.

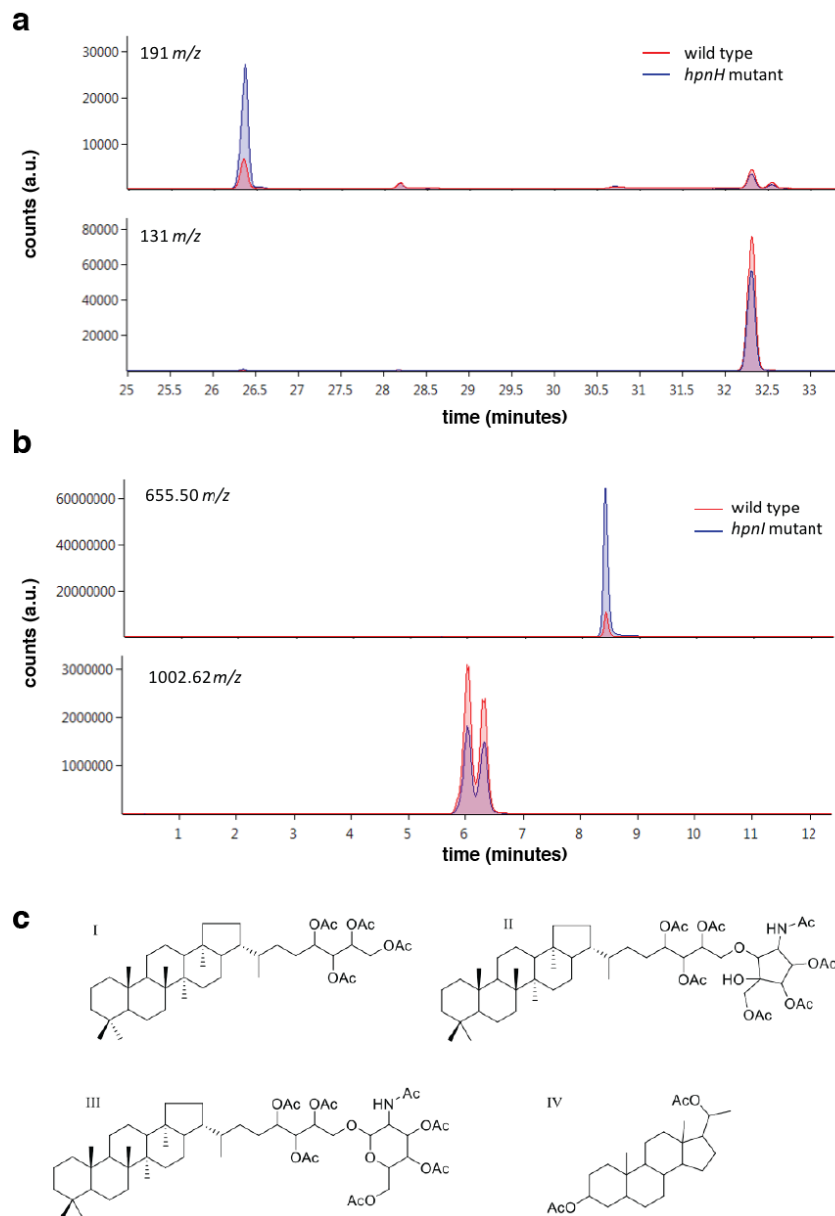

**Figure S2:** Sample chromatograms for hopanoid analyses methods used in this study. (a) GC-MS chromatograms showing the characteristic fragments for hopene (191 *m/z*, top) and diplopterol (131 *m/z*, bottom) for silylated lipids from a wild type *Z. mobilis* culture and one carrying a Tn5 insertion in *hpnH*. Because HpnH utilizes hopene as a substrate, the *hpnH* mutant features increased hopene, but not diplopterol, levels. (b) APCI-LC-TOF-MS chromatograms showing the characteristic ions for acetylated lipids from a wild type *Z. mobilis* culture and one carrying a Tn5 insertion in *hpnI*. The mutant features reduced amounts of BHT (655.50 *m/z* representing  $[M+H-CH_3COOH]^+$  for BHT, top) but

reduced amounts of BHT glucosamine and BHT cyclitol ether (1002.62  $m/z$  representing  $[M+H]^+$  for both species, bottom). The latter species are isomers, so they feature identical masses but can be separated by liquid chromatography. HpnI utilizes BHT as a substrate, so the accumulation of BHT is consistent with reduced copy numbers of *hpnI*. (c) Structure compounds analyzed by LC-APCI-TOF-MS; I-III represent acetylated hopanoid species, while IV is an acetylated internal standard.



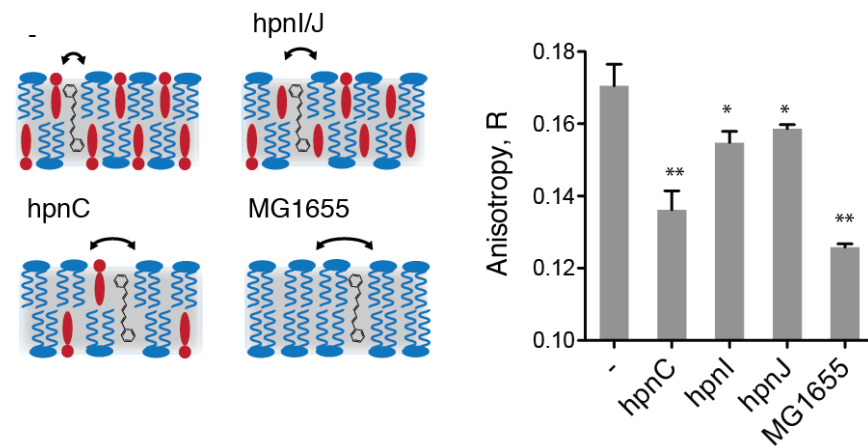

**Figure S3:** The dependence of DPH anisotropy on hopanoid composition in liposomes. For each genotype, liposomes were prepared using lipids extracted from early-stationary phase cultures. Steady-state anisotropy was measured as a unit-less ratio  $R = (I_A - I_B) / (I_A + 2 I_B)$ , where  $I_A$  and  $I_B$  are the emission (430 nm) intensities parallel and perpendicular, respectively, to the polarization of the excitation (360 nm). Higher anisotropy values indicated more highly ordered membranes. *Z. mobilis* control cells (-) feature the highest membrane ordering, reflecting their intact hopanoid composition. Mutants with reduced hopanoids (*hpnC*) feature significantly reduced ordering, while those with altered hopanoid composition (*hpnI* and *hpnJ*) show modest reductions in anisotropy. Liposomes made from *E. coli* lipids (MG1655) show the lowest anisotropy, reflecting the absence of hopanoids. Cartoons on the left diagram the compositional differences for each sample, as well as the relative motion of the DPH probe within the bilayer's hydrophobic core. In the diagrams, the blue and red species are phospholipids and hopanoids, respectively. Error bars indicate mean +/- SEM (n=3). Unpaired t-tests compare indicated lipid composition against the control (-): \*, p < 0.05; \*\*, p < 0.01.

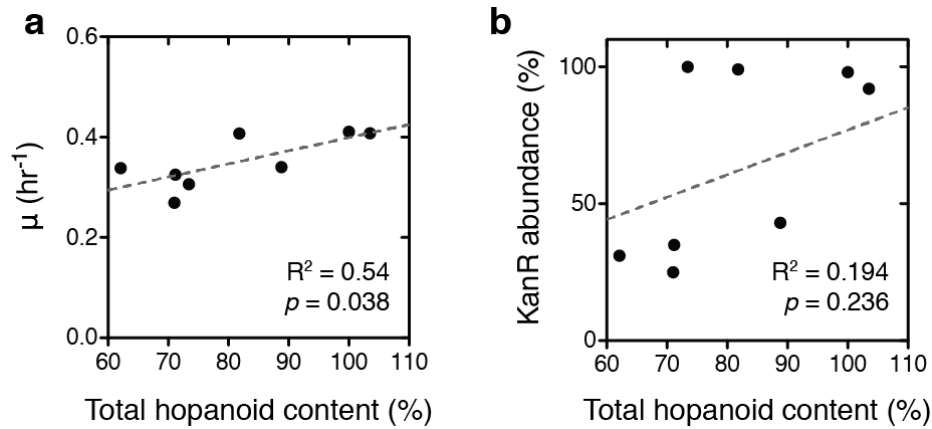

**Figure S4:** Growth rates ( $\mu$ ) of *hpn* mutants are significantly correlated with total hopanoid content (a) but not to the frequency of Tn5 alleles, as measured by sequencing read depth (b). Hopanoid content is presented as a % relative to wild type cells. *P*-values represent significance tests assessing if the slope of the linear regression is non-zero.

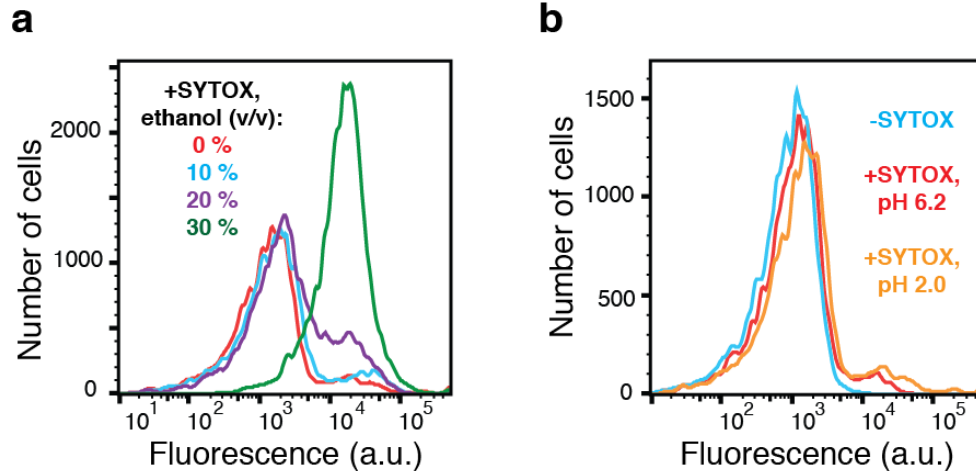

**Figure S5:** Ethanol, but not acid, toxicity is associated with a loss of membrane integrity in *Z. mobilis*. **(a)** SYTOX staining of cells with increasing ethanol concentrations shows that cell death between 20 and 30% (v/v) ethanol corresponds to a loss of membrane integrity. When permeabilization occurs, the polar dye can bind to cellular nucleic acids, leading to increased fluorescence. Cells were stained for 15 minutes with the dye before cytometric measurement. **(b)** In contrast, staining of cells in extreme acidity (pH 2.0) did not exhibit a loss in membrane integrity. Cells under these conditions showed no survival in physiological tests, suggesting that membrane structural changes are not the cause of acid toxicity.

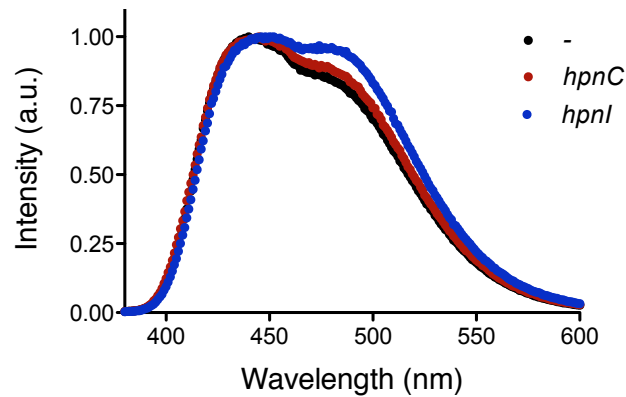

**Figure S6:** The emission spectra for Laurdan (excitation at 364 nm) incubated in liposomes assembled from extracted *Z. mobilis* lipids. Liposomes from control cells (-), featuring intact hopanoid compositions, exhibit a Laurdan emission spectrum that is blue shifted compared to those from cells with reduced (*hpnC*) or altered (*hpnI*) hopanoid levels. This emission difference, quantified by General Polarization (GP) values in the text, measures solvation of the membrane. Increased presence of polar solvent leads to relaxation of the excited dye, thereby red-shifting its emission in membranes that are less ordered near the head group-hydrocarbon interface.

**Table S1:** *Z. mobilis* ZM4 mutants used in this study. Insertion sites provide the genome location of the ‘repeat region’, the sequence immediately before the transposon insertion; the same sequence is repeated at the end of the transposon. Tn5 frequency is the fraction of alleles containing the transposon, as measured by deep sequencing.

|                           | <b>Gene code</b> | <b>Gene symbol</b> | <b>Protein encoded</b>    | <b>Insertion site (bp)</b> | <b>Direction of Tn5</b> | <b>Tn5 frequency (%)</b> |
|---------------------------|------------------|--------------------|---------------------------|----------------------------|-------------------------|--------------------------|
|                           | <i>hpnC</i>      | ZMO0869            | squalene synthase         | 878429-878437              | forward                 | 31                       |
|                           | <i>hpnD</i>      | ZMO0870            | squalene synthase         | 878952-878960              | reverse                 | 35                       |
|                           | <i>hpnF</i>      | ZMO0872            | squalene hopene cyclase   | 882157-882165              | reverse                 | 99                       |
|                           | <i>shc</i>       | ZMO1548            | squalene hopene cyclase   | 1579153-1579161            | reverse                 | 100                      |
| <b>Hopanoid synthesis</b> | <i>hpnG</i>      | ZMO0873            | phosphorylase             | 883206-883214              | forward                 | 43                       |
|                           | <i>hpnH</i>      | ZMO0874            | radical SAM protein       | 884303-884311              | reverse                 | 25                       |
|                           | <i>hpnI</i>      | ZMO0972            | glycosylase               | 987434-987442              | forward                 | 59                       |
|                           | <i>hpnJ</i>      | ZMO0973            | radical SAM protein       | 989161-989169              | forward                 | 98                       |
|                           | <i>hpnK</i>      | ZMO0974            | polysaccharide hydrolyase | 990783-990791              | reverse                 | 92                       |
| <b>Control</b>            |                  | ZMO0047            | lysine exporter protein   | 45590-45598                | forward                 | 100                      |

**Table S2:** Base peaks of targeted analytes for LC-APCI-TOF-MS analysis of elongated hopanoids used in this study. Designated acetylated structures for the compounds are shown in Fig. S2c.

| <b>Compound</b>                                                                    | <b>Acetylated structure</b> | <b>Base peak</b>   | <b>Corresponding ion</b>                |
|------------------------------------------------------------------------------------|-----------------------------|--------------------|-----------------------------------------|
| <b>BHT</b>                                                                         | I                           | 655.50 <i>m/z</i>  | [M+H-CH <sub>3</sub> COOH] <sup>+</sup> |
| <b>BHT ether</b>                                                                   | II                          | 1002.62 <i>m/z</i> | [M+H] <sup>+</sup>                      |
| <b>BHT glucosamine</b>                                                             | III                         | 1002.62 <i>m/z</i> | [M+H] <sup>+</sup>                      |
| <b>5<math>\alpha</math>-pregnane-3<math>\beta</math>,20<math>\beta</math>-diol</b> | IV                          | 345.28 <i>m/z</i>  | [M+H-CH <sub>3</sub> COOH] <sup>+</sup> |

## References:

1. Hermans, M. A. F., Neuss, B. & Sahm, H. Content and Composition of Hopanoids in *Zymomonas mobilis* under Various Growth Conditions. **173**, 5592–5595 (1991).
2. Perzl, M. *et al.* Cloning of conserved genes from *Zymomonas mobilis* and *Bradyrhizobium japonicum* that function in the biosynthesis of hopanoid lipids. *Biochim. Biophys. Acta - Lipids Lipid Metab.* **1393**, 108–118 (1998).
3. Saenz, J. P., Sezgin, E., Schwille, P. & Simons, K. Functional convergence of hopanoids and sterols in membrane ordering. *Proc. Natl. Acad. Sci.* **109**, 14236–14240 (2012).
4. Moreau, R. A., Powell, M. J., Fett, W. F. & Whitaker, B. D. The effect of ethanol and oxygen on the growth of *Zymomonas mobilis* and the levels of hopanoids and other membrane lipids. *Curr. Microbiol.* (1997). doi:10.1007/s002849900224
5. He, M. *et al.* Transcriptome profiling of *Zymomonas mobilis* under ethanol stress. *Biotechnol. Biofuels* **5**, 75 (2012).
6. Pearson, A., Budin, M. & Brocks, J. J. Phylogenetic and biochemical evidence for sterol synthesis in the bacterium *Gemmata obscuriglobus*. *Proc Natl Acad Sci U S A* **100**, 15352–15357 (2003).
7. Ourisson, G. & Rohmer, M. Biohopanoids: A Novel Class of Bacterial Lipids. *Acc. Chem. Res.* **25**, 403–408 (1992).
8. Kannenberg, E., Blume, A., McElhaney, R. & Poralla, K. Monolayer and calorimetric studies of phosphatidylcholines containing branched-chain fatty acids and of their interactions with cholesterol and with a bacterial hopanoid in model membranes. *New York* **733**, 111–116 (1983).
9. Poger, D. & Mark, A. E. The relative effect of sterols and hopanoids on lipid bilayers: When comparable is not identical. *J. Phys. Chem. B* **117**, 16129–16140 (2013).
10. Rohmer, M., Bouvier-Nave, P. & Ourisson, G. Distribution of hopanoid triterpenes in prokaryotes. *Microbiology* **130**, 1137–1150 (1984).
11. Pearson, A., Flood Page, S. R., Jorgenson, T. L., Fischer, W. W. & Higgins, M. B. Novel hopanoid cyclases from the environment. *Environ. Microbiol.* **9**, 2175–2188 (2007).
12. Schmerk, C. L., Bernards, M. A. & Valvano, M. A. Hopanoid production is required for low-pH tolerance, antimicrobial resistance, and motility in *Burkholderia cenocepacia*. *J. Bacteriol.* **193**, 6712–6723 (2011).
13. Welander, P. V. *et al.* Hopanoids play a role in membrane integrity and pH homeostasis in *Rhodopseudomonas palustris* TIE-1. *J. Bacteriol.* **191**, 6145–6156 (2009).
14. Welander, P. V. *et al.* Identification and characterization of *Rhodopseudomonas palustris* TIE-1 hopanoid biosynthesis mutants. *Geobiology* **10**, 163–177 (2012).
15. Kulkarni, G. *et al.* Specific hopanoid classes differentially affect free-living and symbiotic states of *bradyrhizobium diazoefficiens*. *MBio* **6**, 1–9 (2015).
16. Swings, J. & De Ley, J. The biology of *Zymomonas*. *Bacteriol. Rev.* **41**, 1–46 (1977).
17. Lee, K. J., Skotnicki, M. L., Tribe, D. E. & Rogers, P. L. Kinetic Studies on a Highly Productive Strain of *Zymomonas Mobilis*. *Biotechnol. Lett.* **2**, 339–344

- (1980).
18. Flamholz, A., Noor, E., Bar-Even, A., Liebermeister, W. & Milo, R. Glycolytic strategy as a tradeoff between energy yield and protein cost. *Proc. Natl. Acad. Sci. U. S. A.* **110**, 10039–44 (2013).
  19. Sprenger, G. A. Carbohydrate Metabolism in *Zymomonas mobilis*: a Catabolic Highway With Some Scenic Routes. **145**, 301–307 (1996).
  20. He, M. *et al.* *Zymomonas mobilis*: a novel platform for future biorefineries. *Biotechnol. Biofuels* **7**, 101 (2014).
  21. Vierl, U., Löbbecke, L., Nagel, N. & Cevc, G. Solute effects on the colloidal and phase behavior of lipid bilayer membranes: ethanol-dipalmitoylphosphatidylcholine mixtures. *Biophys. J.* **67**, 1067–1079 (1994).
  22. Gurtovenko, A. A. & Anwar, J. Interaction of ethanol with biological membranes: The formation of non-bilayer structures within the membrane interior and their significance. *J. Phys. Chem. B* **113**, 1983–1992 (2009).
  23. You, K. M., Rosenfield, C. & Knipple, D. C. Ethanol tolerance in the yeast *Saccharomyces cerevisiae* is dependent on cellular oleic acid content. *Appl. Environ. Microbiol.* **69**, 1499 (2003).
  24. Thomas, D. S., Hossack, J. A. & Rose, A. H. Plasma-membrane lipid composition and ethanol tolerance in *Saccharomyces cerevisiae*. *Arch. Microbiol.* **117**, 239–245 (1978).
  25. Skerker, J. M. *et al.* Dissecting a complex chemical stress: chemogenomic profiling of plant hydrolysates. *Mol. Syst. Biol.* **9**, 21 (2013).
  26. Espenshade, P. J. & Hughes, A. L. Regulation of Sterol Synthesis in Eukaryotes. *Annu. Rev. Genet.* **41**, 401–427 (2007).
  27. Suurkuusk, J., Lentz, B. R., Barenholz, Y., Biltonen, R. L. & Thompson, T. E. A Calorimetric and Fluorescent Probe Study of the Gel-Liquid Crystalline Phase Transition in Small, Single-Lamellar Dipalmitoylphosphatidylcholine Vesicles. *Biochemistry* **15**, 1393–1401 (1976).
  28. Holte, L. L. & Gawrisch, K. Determining ethanol distribution in phospholipid multilayers with MAS- NOESY spectra. *Biochemistry* **36**, 4669–4674 (1997).
  29. Parasassi, T., Krasnowska, E. K., Bagatolli, L. & Gratton, E. Laurdan and Prodan as polarity-sensitive fluorescent membrane probes. *J Fluoresc.* **8**, 365–373 (1998).
  30. Zeng, J. & Chong, P. L. Effect of ethanol-induced lipid interdigitation on the membrane solubility of Prodan, Acдан, and Laurdan. *Biophys. J.* **68**, 567–573 (1995).
  31. Simon, S. A. & McIntosh, T. J. Interdigitated hydrocarbon chain packing causes the biphasic transition behavior in lipid/alcohol suspensions. *BBA - Biomembr.* **773**, 169–172 (1984).
  32. Mou, J., Yang, J., Shao, Z. & Huang, C. Alcohol Induces Interdigitated Domains in Unilamellar Phosphatidylcholine Bilayers. *Biochemistry* **33**, 9981–9985 (1994).
  33. Zeng, J., Smith, K. E. & Chong, P. L. Effects of alcohol-induced lipid interdigitation on proton permeability in L-alpha-dipalmitoylphosphatidylcholine vesicles. *Biophys. J.* **65**, 1404–1414 (1993).
  34. Yeagle, P. L. Cholesterol and the cell membrane. *BBA - Rev. Biomembr.* **822**, 267–287 (1985).



35. Deamer, D. W. & Nichols, J. W. Proton flux mechanisms in model and biological membranes. *J. Membr. Biol.* **107**, 91–103 (1989).
36. Tierney, K. J., Block, D. E. & Longo, M. L. Elasticity and phase behavior of DPPC membrane modulated by cholesterol, ergosterol, and ethanol. *Biophys. J.* **89**, 2481–2493 (2005).
37. Curatolo, W. The physical properties of glycolipids. *Biochim. Biophys. Acta* **906**, 111–136 (1987).
38. Iwamoto, K., Sunamoto, J., Inoue, K., Endo, T. & Nojima, S. Importance of surface structure in liposomal membranes of glyceroglycolipids. *Biochim. Biophys. Acta* **691**, 44–51 (1982).
39. Bradley, A. S., Pearson, A., S??enz, J. P. & Marx, C. J. Adenosylhopane: The first intermediate in hopanoid side chain biosynthesis. *Org. Geochem.* **41**, 1075–1081 (2010).
40. Schmerk, C. L. *et al.* Elucidation of the Burkholderia cenocepacia hopanoid biosynthesis pathway uncovers functions for conserved proteins in hopanoid-producing bacteria. *Environ. Microbiol.* **17**, 735–750 (2015).
41. Pecoraro, V., Zerulla, K., Lange, C. & Soppa, J. Quantification of ploidy in proteobacteria revealed the existence of monoploid, (mero-)oligoploid and polyploid species. *PLoS One* **6**, (2011).
42. Thompson, M. G. *et al.* Isolation and characterization of novel mutations in the pSC101 origin that increase copy number. *Sci. Rep.* **8**, 1–11 (2018).
43. Bligh, E. G. & Dyer, W. S. A rapid method of total lipid extraction and purification. *Can. J. Biochem. Physiol.* **37**, 911–917 (1959).
44. Talbot, H. M., Summons, R., Jahnke, L. & Farrimond, P. Characteristic fragmentation of bacteriohopanepolyols during atmospheric pressure chemical ionisation liquid chromatography/ion trap mass spectrometry. *Rapid Commun. Mass Spectrom.* **17**, 2788–2796 (2003).
